# Supplementary material for: Therapeutic Potential of Adipose Stem Cell-Derived Conditioned Medium on Scar Contraction Model
Source: MDPI journal article supplement (doi:10.3390/biomedicines10102388), 2022-09-24
Supplement: s1 [file s1]

Table S1. Gene ontologies with the top 10 lowest *p*-values of DMEM treated samples on the day 4

| GOID       | Description                                             | <i>p</i> -value | Genes symbol                                                                                                                                                                          |
|------------|---------------------------------------------------------|-----------------|---------------------------------------------------------------------------------------------------------------------------------------------------------------------------------------|
| GO:0030593 | neutrophil chemotaxis                                   | 8.89564E-06     | <i>ITGA9, CCL7, TREM1, CCL20, PDE4B, CCL2, CXCL8, ITGA1</i>                                                                                                                           |
| GO:0006260 | DNA replication                                         | 2.13387E-05     | <i>MCM3, POLD3, TIMELESS, DBF4, RFC5, MCM4, RMI2, NASP, DNA2, RMI1, CCDC88A, BARD1, POLA1, BRIP1, MCM8, CLSPN, CDK2</i>                                                               |
| GO:0000731 | DNA synthesis involved in DNA repair                    | 7.78326E-05     | <i>BARD1, POLD3, POLA1, RAD51B, BRIP1, RMI2, DNA2, RMI1</i>                                                                                                                           |
| GO:0006281 | DNA repair                                              | 9.75857E-05     | <i>SMC1A, MSH2, PARP2, RFC5, RECQL, SLF1, NABP1, PARPBP, UCHL5, RFWF3, POLA1, FANCL, RAD51B, POLQ, SMC3, FANCI, CLSPN, GEN1, DDX11, CDK2</i>                                          |
| GO:0051301 | cell division                                           | 0.000698835     | <i>USP37, SMC1A, SPDLI, KIF14, CETN3, TIMELESS, CCSAP, SMC4, PMF1-BGLAP, NCAPG2, CENPF, NCAPD3, CCND1, ERCC6L, KIF20B, MASTL, NEDD1, CDC14A, CENPJ, SMC3, CDK2, CABLES2, MIS18BP1</i> |
| GO:0042060 | wound healing                                           | 0.000714325     | <i>ITGA9, IL24, WNT5A, PAK1, CCL20, SERPINB2, FGFR1OP2, TGFA, EREG</i>                                                                                                                |
| GO:0000732 | strand displacement                                     | 0.000979047     | <i>BARD1, RAD51B, BRIP1, RMI2, DNA2, RMI1</i>                                                                                                                                         |
| GO:0007099 | centriole replication                                   | 0.001026411     | <i>CEP152, CENPJ, CDK2, PLK4, SASS6</i>                                                                                                                                               |
| GO:0007062 | sister chromatid cohesion                               | 0.001060729     | <i>CENPI, CENPL, SMC1A, ERCC6L, SPDLI, CENPK, CENPQ, SMC3, PMF1-BGLAP, CENPF, DDX11</i>                                                                                               |
| GO:0000724 | double-strand break repair via homologous recombination | 0.001201353     | <i>RAD54B, MMS22L, RAD51B, POLQ, SWSAP1, MCM8, GEN1, NABP1, RECQL</i>                                                                                                                 |

Table S2. Gene ontologies with the top 10 lowest *p*-values of DMEM treated samples on the day 8

| GOID       | Description                                             | <i>p</i> -value | Genes symbol                                                                            |
|------------|---------------------------------------------------------|-----------------|-----------------------------------------------------------------------------------------|
| GO:0071805 | potassium ion transmembrane transport                   | 0.000613        | <i>KCNN4, SLC9A3, SLC9A5, KCNMB3, KCNAB1, KCNH5, KCNK3</i>                              |
| GO:0051056 | regulation of small GTPase mediated signal transduction | 0.002384        | <i>NET1, FGD4, TIAM1, RAC3, ARHGAP22, ARAP2, NGEF, STARD8, ARHGAP39</i>                 |
| GO:0006955 | immune response                                         | 0.006847        | <i>TNFSF12-TNFSF13, TNFSF11, ENPP1, CIITA, HLA-B, IL15, TNFRSF6B, B2M, CHUK, JCHAIN</i> |
| GO:0050427 | 3'-phosphoadenosine 5'-phosphosulfate metabolic process | 0.008382        | <i>ENPP1, SULT1A3, SULT1B1</i>                                                          |
| GO:0051965 | positive regulation of synapse assembly                 | 0.009981        | <i>EPHB1, NTRK2, LRRN3, LRRTM1, EFNA5</i>                                               |
| GO:0030574 | collagen catabolic process                              | 0.017147        | <i>COL11A2, ADAMTS3, COL6A6, MMP7, MMP8</i>                                             |
| GO:0007130 | synaptonemal complex assembly                           | 0.01724         | <i>SYCP2, SYCE1, REC8</i>                                                               |
| GO:0007631 | feeding behavior                                        | 0.02869         | <i>NEGR1, NTRK2, MRAP2</i>                                                              |
| GO:0030500 | regulation of bone mineralization                       | 0.033022        | <i>PHOSPHO1, ENPP1, MGP</i>                                                             |
| GO:0006813 | potassium ion transport                                 | 0.035327        | <i>KCNN4, KCNMB3, KCNAB1, KCNK3</i>                                                     |

Table S3. Gene ontologies with the top 10 lowest *p*-values of DMEM treated samples on the day 14

| GOID       | Description                               | <i>p</i> -value | Genes symbol                                                                                                                                                                                              |
|------------|-------------------------------------------|-----------------|-----------------------------------------------------------------------------------------------------------------------------------------------------------------------------------------------------------|
| GO:0030198 | extracellular matrix organization         | 3.37515E-06     | <i>FOXF1, ITGA11, FBLN1, VIT, COL11A1, TNC, COL16A1, NID1, COL5A2, SMOC2, COL8A2, COL8A1, VCAM1, MFAP2, ITGB5, FBN1, PXDN, LAMC3</i>                                                                      |
| GO:0007155 | cell adhesion                             | 3.86451E-06     | <i>SEMA5A, ADAM17, ITGA11, COL12A1, CDH11, SPON2, PCDH11, TNC, CD34, EPHA4, WISP2, NINJ2, THBS2, THBS4, VCAM1, MFGE8, LRFN3, PTPRS, CLCA2, COL16A1, COL8A1, ITGB5, MFAP4, ENTPD1, FBLN7, ROBO2, LAMC3</i> |
| GO:0007275 | multicellular organism development        | 0.000187371     | <i>ANGPTL2, ZNF516, TLL2, TMEFF1, DKK2, TNFRSF14, MITF, MC1R, TSNAXIP1, ZSWIM9, WNT11, SALL4, TSHZ2, ZFP41, PBXIP1, VANGL2, HIVEP1, FRAT2, PLXNA1, ROR2, PDGFD, TSHZ3, MXD1, CCDC120, SFRP2</i>           |
| GO:0030335 | positive regulation of cell migration     | 0.00098139      | <i>SEMA5A, FOXF1, ADAM17, SEMA3E, CTSH, PDGFRB, ROR2, TCAF2, PDGFD, SEMA6C, GPER1, WNT11, EDN1, IRS2</i>                                                                                                  |
| GO:0008284 | positive regulation of cell proliferation | 0.001327051     | <i>IL7, PTH1R, ADAM17, HDAC4, CTSH, PDGFRB, FGFR2, TNC, FGFR1, AKR1C3, DPP4, IL34, TNS3, AKR1C2, PDGFD, GPER1, ALDH1A2, EDN1, TNFSF13B, IRS2, LRP5, SFRP2</i>                                             |
| GO:0030326 | embryonic limb morphogenesis              | 0.002477965     | <i>SKI, SP9, MEGF8, SALL4, TBX5, FGFR1</i>                                                                                                                                                                |
| GO:0060349 | bone morphogenesis                        | 0.002798992     | <i>SKI, PAPP2, FGFR2, LRP5, SFRP2</i>                                                                                                                                                                     |
| GO:0010875 | positive regulation of cholesterol efflux | 0.003363154     | <i>PLTP, ABCA7, LRP1, ABCA1</i>                                                                                                                                                                           |
| GO:0030574 | collagen catabolic process                | 0.004203235     | <i>COL8A2, MRC2, COL8A1, COL12A1, MMP15, COL11A1, COL5A2</i>                                                                                                                                              |
| GO:0035987 | endodermal cell differentiation           | 0.005777322     | <i>COL8A1, ITGB5, COL12A1, MMP15, COL11A1</i>                                                                                                                                                             |

Table S4. Gene ontologies with the top 10 lowest *p*-values depleted in ASC-CM compared to in DMEM at day 4

| <b>GOID</b> | <b>Description</b>                                       | <b><i>p</i>-value</b> | <b>Genes symbol</b>                                                                                    |
|-------------|----------------------------------------------------------|-----------------------|--------------------------------------------------------------------------------------------------------|
| GO:0006955  | immune response                                          | 3.03967E-08           | <i>IL32, CXCL6, OAS2, CCL2, LIF, THBS1, IL6, CXCL2, TNFSF12-TNFSF13, IL1RAP, CXCL1, TNFSF11, CXCL8</i> |
| GO:0070098  | chemokine-mediated signaling pathway                     | 6.34777E-07           | <i>CXCL6, CCL2, ACKR3, CXCL2, CXCL1, CXCL8</i>                                                         |
| GO:0071356  | cellular response to tumor necrosis factor               | 3.12186E-06           | <i>CCL2, ANKRD1, THBS1, VCAM1, IL6, ASS1, CXCL8, EDN1</i>                                              |
| GO:0045429  | positive regulation of nitric oxide biosynthetic process | 7.17706E-06           | <i>PTGS2, AGT, PTX3, IL6, ASS1, EDN1</i>                                                               |
| GO:0006935  | chemotaxis                                               | 1.61191E-05           | <i>CXCL6, CCL2, ACKR3, CYR61, CXCL2, CXCL1, CXCL8</i>                                                  |
| GO:0006954  | inflammatory response                                    | 3.04927E-05           | <i>CXCL6, CCL2, TSPAN2, THBS1, PTGS2, PTX3, IL6, CXCL2, IL1RAP, CXCL1, CXCL8</i>                       |
| GO:0060326  | cell chemotaxis                                          | 0.000356406           | <i>CXCL6, CCL2, VCAM1, CXCL2, CXCL1</i>                                                                |
| GO:0071347  | cellular response to interleukin-1                       | 0.000356406           | <i>CCL2, ANKRD1, IL6, CXCL8, EDN1</i>                                                                  |
| GO:0007155  | cell adhesion                                            | 0.000415505           | <i>IL32, HAPLN1, CCL2, ACKR3, THBS1, OMD, CTGF, PCDHA3, VCAM1, CYR61, CD24</i>                         |
| GO:0048661  | positive regulation of smooth muscle cell proliferation  | 0.000896931           | <i>NR4A3, THBS1, PTGS2, IL6, EDN1</i>                                                                  |

Table S5. Gene ontologies with the top 10 lowest *p*-values depleted in ASC-CM compared to in DMEM at day 8

| <b>GOID</b> | <b>Description</b>                 | <b><i>p</i>-value</b> | <b>Genes symbol</b>                                                                                            |
|-------------|------------------------------------|-----------------------|----------------------------------------------------------------------------------------------------------------|
| GO:0001501  | skeletal system development        | 1.44637E-08           | <i>COL10A1, HAPLN1, IGF2, CMKLR1, COMP, TNFRSF11B, COL1A1, CHRD, PHEX, RASSF2, IGF1, PKDCC, MATN3</i>          |
| GO:0030198  | extracellular matrix organization  | 5.88166E-06           | <i>COL10A1, HAPLN1, ELN, TGFB1, COL9A3, THBS1, COL5A1, COMP, ECM2, COL1A1, MATN3, TNFRSF11B</i>                |
| GO:0030282  | bone mineralization                | 4.12692E-05           | <i>PTN, PHEX, ASPN, TUFT1, PKDCC, CLEC3B</i>                                                                   |
| GO:0007155  | cell adhesion                      | 8.86362E-05           | <i>HAPLN1, IL32, APLP1, NEDD9, OMD, EFNB2, COL5A1, EPHA3, COL15A1, COMP, COL1A1, TGFB1, THBS1, CTGF, MFAP4</i> |
| GO:0006955  | immune response                    | 0.000526688           | <i>IL32, CMKLR1, CRIP1, THBS1, IL16, CXCL2, IL1RAP, TNFRSF11B, MAP3K14, TNFRSF6B</i>                           |
| GO:0008544  | epidermis development              | 0.001039465           | <i>CRABP2, CTGF, KRT16, KRT34, KRT14</i>                                                                       |
| GO:0006954  | inflammatory response              | 0.001066716           | <i>TSPAN2, THBS1, PLA2G4B, KRT16, C4A, PTX3, CXCL2, IL1RAP, TRIL, TNFRSF11B, TNFRSF6B</i>                      |
| GO:0044267  | cellular protein metabolic process | 0.0012618             | <i>IGF2, TGFB1, PGA3, ADORA2B, PAPP2, IGF1</i>                                                                 |
| GO:0006508  | proteolysis                        | 0.002863469           | <i>PHEX, PGA3, ADAMTS15, XPNPEP2, HTRA3, PAPP2, UFSPI, C4A, ADAMTS10, MASPI, ADAMTS16</i>                      |
| GO:0061436  | establishment of skin barrier      | 0.002904707           | <i>FLG, KRT16, TMEM79</i>                                                                                      |

Table S6. Gene ontologies with the top 10 lowest *p*-values depleted in ASC-CM compared to in DMEM at day 14

| GOID       | Description                            | <i>p</i> -value | Genes symbol                                                                                                                                                                                                                                           |
|------------|----------------------------------------|-----------------|--------------------------------------------------------------------------------------------------------------------------------------------------------------------------------------------------------------------------------------------------------|
| GO:0007155 | cell adhesion                          | 8.30973E-19     | <i>HAPLN1, NEDD9, LOXL2, COL16A1, EFNB2, COL5A1, TINAGL1, ITGBL1, BCAM, ITGB2, THBS1, CTGF, COL8A1, TNC, SCARF1, LAMC3, PKP1, COL12A1, ROBO2, AOC3, HES1, COL15A1, RHOB, COMP, CD34, COL1A1, THBS4, GP1BB, DPT, TGFBI, ATP1B1, VCAM1, SPON1, MFAP4</i> |
| GO:0030198 | extracellular matrix organization      | 1.2084E-13      | <i>COL10A1, HAPLN1, LAMC3, COL16A1, COL5A1, HSPG2, SPARC, COMP, COL1A1, BGN, ELN, LOX, TGFBI, ITGB2, THBS1, COL8A1, COL8A2, VCAM1, COL11A1, MATN3, TNC</i>                                                                                             |
| GO:0030199 | collagen fibril organization           | 1.43908E-06     | <i>LOXL2, LOX, DPT, COL5A1, SERPINF2, COL12A1, COL11A1, COL1A1</i>                                                                                                                                                                                     |
| GO:0001501 | skeletal system development            | 4.25762E-06     | <i>COL10A1, HAPLN1, GDF10, CMKLR1, EXTL1, COL12A1, IGF1, COMP, COL1A1, MATN3, NPR3</i>                                                                                                                                                                 |
| GO:0030574 | collagen catabolic process             | 1.07783E-05     | <i>COL10A1, COL5A1, COL8A2, COL8A1, COL12A1, COL15A1, COL11A1, COL1A1</i>                                                                                                                                                                              |
| GO:0032870 | cellular response to hormone stimulus  | 9.03104E-05     | <i>SIK1, FOSB, ROBO2, SIK1B, SLIT3, OXTR</i>                                                                                                                                                                                                           |
| GO:0071300 | cellular response to retinoic acid     | 0.000179929     | <i>WNT7B, CYP26B1, BRINP2, AQP1, WNT2, COL1A1, TNC</i>                                                                                                                                                                                                 |
| GO:0030324 | lung development                       | 0.000300014     | <i>WNT7B, LOX, CTGF, WNT2, HES1, SPARC, FGF18</i>                                                                                                                                                                                                      |
| GO:0045721 | negative regulation of gluconeogenesis | 0.000457811     | <i>SIK1, C1QTNF3, IL6, SIK1B</i>                                                                                                                                                                                                                       |
| GO:0007568 | aging                                  | 0.000757986     | <i>LOXL2, UCP2, ITGB2, DMD, NTRK1, CTGF, VCAM1, IL6, KRT14</i>                                                                                                                                                                                         |

Table S7. Gene ontologies with the top 10 lowest *p*-values of cluster3

| GOID       | Description                                                                                   | <i>p</i> -value | Genes symbol                                                                                                                                                                                                                                                                                                                                                                                                                         |
|------------|-----------------------------------------------------------------------------------------------|-----------------|--------------------------------------------------------------------------------------------------------------------------------------------------------------------------------------------------------------------------------------------------------------------------------------------------------------------------------------------------------------------------------------------------------------------------------------|
| GO:0006366 | transcription from RNA polymerase II promoter                                                 | 8.60E-05        | <i>AKNA, CAMTA2, CEBPB, CEBPD, DBP, EGR1, EGR2, ELF4, ELK1, EPAS1, ETS1, FOS, GMEB2, GTF2F1, IRF1, IRF3, IRF7, JUND, KLF4, MAFK, MED16, MEIS3, MLLT1, MSC, NELFB, NFATC1, NFIC, NRL, OSR2, PAX3, PBX4, PIR, PITX1, POLR2A, POLR2E, POLR2J3-UPK3BL2, SALL4, SCAF1, SOX12, SSBP4, SUPT5H, TAF6, TFAP2A, TP53, USF2</i>                                                                                                                 |
| GO:0000122 | negative regulation of transcription from RNA polymerase II promoter                          | 8.66E-04        | <i>AJUBA, ANKRD2, ARID5B, BCL11A, BHLHE41, BTG2, CBX4, CBX8, CC2D1A, CD36, CRY2, DACT1, EDN1, EGR1, ERF, ESRRA, FST, HDAC5, HEXIM2, HEY2, HSF1, IFI27, IRF7, JDP2, JUND, KLF4, LMCD1, MBD3, MEN1, MEPCE, MSC, NCOR2, NFIC, NR1H2, NR2F6, OSR2, PCGF2, PIAS4, PKIG, PPARD, PPP1R13L, RARA, RARG, RBM10, RELB, RITA1, SALL4, SMAD3, STAT3, SUPT5H, TFAP2A, TGIF1, TLE4, TLE5, TP53, TRIM28, VAX2, WFS1, YBX3, ZFP36, ZFPM1, ZNF296</i> |
| GO:0042771 | intrinsic apoptotic signaling pathway in response to DNA damage by p53 class mediator         | 0.001032        | <i>BAG6, CDKN1A, NUPR1, PHLDA3, PML, PYCARD, SHISA5, TP53</i>                                                                                                                                                                                                                                                                                                                                                                        |
| GO:0098609 | cell-cell adhesion                                                                            | 0.001637        | <i>ARFIP2, ARHGAP1, ATXN2L, BAIAP2, CC2D1A, CCS, CORO1B, DBN1, EHD1, EPHA2, EPS8L2, FLRT3, FSCN1, GIPC1, H1-10, HSPA1A, MARK2, MICALL1, MPP7, PLIN3, PPP1R13L, RAB11B, SCYL1, SEPTIN9, SH3GL1, STK38, TBC1D10A, TWF2, UNC45A, VASN</i>                                                                                                                                                                                               |
| GO:0033574 | response to testosterone                                                                      | 0.002503        | <i>BAD, DUSP1, EDN1, HSF1, PLN, TBXA2R, THBS1, TSPO</i>                                                                                                                                                                                                                                                                                                                                                                              |
| GO:0008285 | negative regulation of cell proliferation                                                     | 0.00414         | <i>ADARB1, ADM, B4GALT1, BAK1, BTG2, CDKN1A, CSK, CXCL1, ETS1, FGFR1, FUZ, GSDME, HSF1, IFITM1, IRF1, KLF4, MEN1, NACC2, NTRK1, P3H1, P3H3, PLAAT4, PML, PTK2B, QSOX1, RARA, RARG, RBM10, RBM38, RGCC, RPS6KA2, SIRT6, SLIT3, STAT3, TAF6, TFAP2A, TNS2, TP53, TP53I11</i>                                                                                                                                                           |
| GO:0010803 | regulation of tumor necrosis factor-mediated signaling pathway                                | 0.00521         | <i>CLIP3, IKBKG, PYCARD, RBCK1, RNF31, SHARPIN, TNFRSF1A, TRADD</i>                                                                                                                                                                                                                                                                                                                                                                  |
| GO:0010595 | positive regulation of endothelial cell migration                                             | 0.005892        | <i>AGT, ANXA3, BCAR1, BCAS3, EDN1, ETS1, PRKD2, PTK2B, THBS1, ZNF580</i>                                                                                                                                                                                                                                                                                                                                                             |
| GO:0050728 | negative regulation of inflammatory response                                                  | 0.006739        | <i>ETS1, FEM1A, KLF4, NLRX1, PPARD, PTGIS, SHARPIN, SMAD3, SOCS3, TNFAIP6, TNFRSF1A, ZFP36</i>                                                                                                                                                                                                                                                                                                                                       |
| GO:0006977 | DNA damage response, signal transduction by p53 class mediator resulting in cell cycle arrest | 0.007206        | <i>BTG2, CARM1, CDKN1A, GADD45A, MUC1, PLK2, PML, RBM38, RGCC, TP53, ZNF385A</i>                                                                                                                                                                                                                                                                                                                                                     |

Table S8. Gene ontologies with the top 10 lowest *p*-values of cluster4

| <b>GOID</b> | <b>Description</b>                                                   | <b><i>p</i>-value</b> | <b>Genes symbol</b>                                                                                                                                                                                                                                                                                                                                       |
|-------------|----------------------------------------------------------------------|-----------------------|-----------------------------------------------------------------------------------------------------------------------------------------------------------------------------------------------------------------------------------------------------------------------------------------------------------------------------------------------------------|
| GO:0007409  | axonogenesis                                                         | 1.45E-04              | <i>CNP, ECM2, FGFR2, LLGL1, LRFN3, LRFN4, LUM, NOTCH1, NTNG2, OGN, OMD, PAK3, PRELP, STK11</i>                                                                                                                                                                                                                                                            |
| GO:0061337  | cardiac conduction                                                   | 4.93E-04              | <i>CACNA1C, CACNB1, CACNB3, CACNB4, KCND2, KCNJ12, KCNK15, SCN1B</i>                                                                                                                                                                                                                                                                                      |
| GO:0007155  | cell adhesion                                                        | 7.31E-04              | <i>ADAM12, CCN4, CCN5, CD34, CDH11, CLSTN1, CNTN1, COL12A1, COL8A1, CYP1B1, EFNB1, EMILIN1, EMILIN2, ENTPD1, EPHB4, GAS6, GP1BB, ITGA11, JUP, LAMB2, LGALS3BP, LRFN3, MFAP4, MFGE8, NECTIN4, NINJ2, NUAK1, OMD, PGAP6, PTK7, ROBO2, SCN1B, SEMA5A, SPON2, SVEP1, THBS2, THBS3, THBS4, TNXB, VCAM1</i>                                                     |
| GO:0008203  | cholesterol metabolic process                                        | 0.001019              | <i>APOE, CEBPA, CUBN, CYP7B1, LIPC, LRP5, PCSK9, RXRA, SCAP, SREBF1, SREBF2</i>                                                                                                                                                                                                                                                                           |
| GO:0000122  | negative regulation of transcription from RNA polymerase II promoter | 0.002705              | <i>ALX1, CBX6, CDKN1C, CEBPA, CIC, CREBBP, CXXC5, E4F1, FGFR1, FGFR2, FOXF1, FRK, GLIS1, GLIS2, HCFC1, HDAC4, HDAC7, HES6, HIC1, IRF2BPL, MDF1, MSX1, MYOP, MZF1, NFIB, NFIX, NOTCH1, NR1D1, NR1H3, PLK3, RERE, RXRA, SKI, SKOR1, SMO, SREBF1, SREBF2, TCF3, THRB, TSHZ3, TXNIP, VDR, VHL, WDTC1, ZBTB20, ZBTB4, ZBTB7A, ZHX2, ZNF205, ZNF219, ZNF496</i> |
| GO:0042157  | lipoprotein metabolic process                                        | 0.003246              | <i>APOE, APOL3, APOL4, BMP1, CUBN, PCSK9, SDC1</i>                                                                                                                                                                                                                                                                                                        |
| GO:0060484  | lung-associated mesenchyme development                               | 0.003682              | <i>FGFR1, FGFR2, PTK7, WNT11</i>                                                                                                                                                                                                                                                                                                                          |
| GO:0010508  | positive regulation of autophagy                                     | 0.005669              | <i>PIM2, PLEKHF1, STK11, TFEB, TICAM1, TPCN1, TRIM8, ULK1</i>                                                                                                                                                                                                                                                                                             |
| GO:1900182  | positive regulation of protein localization to nucleus               | 0.00639               | <i>CDKN2A, GLIS2, NGFR, SRC, STK11, TRIM8</i>                                                                                                                                                                                                                                                                                                             |
| GO:0030514  | negative regulation of BMP signaling pathway                         | 0.007327              | <i>ABL1, BMPER, CHRDL1, HTRA3, LEMD2, NOTCH1, SKI, SKOR1</i>                                                                                                                                                                                                                                                                                              |
